# Supplementary material for: DNA copy number aberrations in endobronchial lesions: a validated predictor for cancer
Source: HighWire-hosted journal article supplement (doi:10.1136/thoraxjnl-2013-203821), 2013-11-13
Supplement: thoraxjnl-2013-203821supp_table.pdf [file thoraxjnl-2013-203821supp_table.pdf]

## **SUPPORTING INFORMATION**

DNA COPY NUMBER ABERRATIONS IN ENDOBRONCHIAL LESIONS: A VALIDATED PREDICTOR FOR CANCER by *Robert A.A. van Boerdonk; Johannes M.A. Daniels; Peter J.F. Snijders; Katrien Grünberg; Erik Thunnissen; Mark A. van de Wiel; Bauke Ylstra; Pieter E. Postmus; Chris J.L.M. Meijer; Gerrit A. Meijer; Egbert F. Smit; Thomas G. Sutedja; Daniëlle A.M. Heideman.*

**SUPPLEMENTARY TABLE 1. DETAILS OF BASELINE ENDOBRONCHIAL LESIONS: HISTOLOGY AND CORRESPONDING MOLECULAR FEATURES**

| Case subjects | Study ID | Routine histology diagnosis FFPE biopsy | Review histology diagnosis FFPE biopsy | Review histology diagnosis frozen biopsy | Aberrant genomic features (%) | CNA-based classifier |
|---------------|----------|-----------------------------------------|----------------------------------------|------------------------------------------|-------------------------------|----------------------|
|               | 1        | N                                       | ntd                                    | LGD                                      | 27.6                          | pos                  |
|               | 2        | SqM                                     | miD                                    | LGD                                      | 60.6                          | pos                  |
|               | 3        | SqM                                     | SqM                                    | LGD                                      | 0.0                           | neg                  |
|               | 4        | SqM                                     | D-ind                                  | no consensus (HGD / LGD)                 | 78.2                          | pos                  |
|               | 5        | moD                                     | miD                                    | no consensus (HGD / LGD)                 | 71.0                          | pos                  |
|               | 6        | SD                                      | no consensus (ntd / SD)                | HGD                                      | 58.2                          | pos                  |
|               | 7        | SD                                      | D-ind                                  | D-ind                                    | 56.9                          | pos                  |
|               | 8        | SD                                      | moD                                    | no consensus (D-ind / N)                 | 0.2                           | neg                  |
|               | 9        | SD                                      | D-ind                                  | ntd*                                     | 0.1                           | neg                  |
|               | 10       | SD                                      | SD                                     | HGD                                      | 31.7                          | pos                  |
|               | 11       | SD                                      | ntd                                    | D-ind                                    | 44.3                          | pos                  |
|               | 12       | D-ind                                   | SD                                     | HGD                                      | 38.0                          | pos                  |

| Control subjects | Study ID | Routine histology diagnosis FFPE biopsy | Review histology diagnosis FFPE biopsy | histology diagnosis frozen biopsy | Aberrant genomic features (%) | CNA-based classifier |
|------------------|----------|-----------------------------------------|----------------------------------------|-----------------------------------|-------------------------------|----------------------|
|                  | 1        | SqM                                     | SqM                                    | LGD                               | 0.0                           | neg                  |
|                  | 2        | SqM                                     | no consensus (miD / SqM)               | LGD                               | 0.4                           | neg                  |
|                  | 3        | SqM                                     | SqM                                    | LGD                               | 2.4                           | neg                  |
|                  | 4        | SqM                                     | SqM                                    | LGD                               | 0.0                           | neg                  |
|                  | 5        | miD                                     | miD                                    | LGD                               | 0.0                           | neg                  |
|                  | 6        | miD                                     | miD                                    | LGD                               | 0.1                           | neg                  |
|                  | 7        | miD                                     | SqM                                    | LGD                               | 0.0                           | neg                  |
|                  | 8        | miD                                     | miD                                    | LGD                               | 0.0                           | neg                  |
|                  | 9        | moD                                     | miD                                    | LGD                               | 0.0                           | neg                  |
|                  | 10       | moD                                     | D-ind                                  | D-ind                             | 0.0                           | neg                  |
|                  | 11       | moD                                     | ntd                                    | LGD                               | 0.0                           | neg                  |
|                  | 12       | moD                                     | SqM                                    | LGD                               | 0.0                           | neg                  |
|                  | 13       | SD                                      | SqM                                    | LGD                               | 0.0                           | neg                  |
|                  | 14       | SD                                      | miD                                    | LGD                               | 0.0                           | neg                  |
|                  | 15       | SD                                      | no consensus (moD / SqM)               | N                                 | 0.1                           | neg                  |
|                  | 16       | SD                                      | no consensus (moD / SqM)               | LGD                               | 0.0                           | neg                  |
|                  | 17       | SD                                      | SD                                     | HGD                               | 0.0                           | neg                  |
|                  | 18       | SD                                      | SqM                                    | LGD                               | 0.0                           | neg                  |
|                  | 19       | SD                                      | miD                                    | N                                 | 0.1                           | neg                  |
|                  | 20       | SD                                      | ntd                                    | N                                 | 0.0                           | neg                  |
|                  | 21       | SD                                      | SqM                                    | LGD                               | 0.0                           | neg                  |
|                  | 22       | SD                                      | D-ind                                  | N                                 | 0.8                           | neg                  |
|                  | 23       | D-ind                                   | ntd                                    | LGD                               | 0.1                           | neg                  |
|                  | 24       | N                                       | ntd                                    | D-ind                             | 0.1                           | neg                  |

## **LEGENDS FOR SUPPLEMENTARY TABLES**

Histology review diagnoses are reported as the consensus diagnosis, or ‘no consensus’ (*i.e.*, no agreement between the two expert pathologists) with individual assignment indicated between brackets. Abbreviations used: D-ind, dysplasia-indefinite for grade; HGD, high-grade disease; LGD, low-grade disease; miD, mild dysplasia; moD, moderate dysplasia; N, normal histology; neg, negative (CNAs not present); ntd, not able to determine (*i.e.*, specimen of inadequate quality measures); pos, positive (CNAs present); SD, severe dysplasia; SqM, squamous metaplasia. \*) absence of  $\geq$ CIS confirmed.
